# Supplementary material for: Synthesis and characterization of Bi(VO4)1−m(PO4)mnanofibers by electrospinning process with enhanced photocatalytic activity under visible light
Source: Royal Society of Chemistry journal article supplement (doi:10.1039/c4ra04107k), 2014-07-17
Supplement: c4ra04107k1.pdf [file c4ra04107k1.pdf]

Supporting Information for  
Synthesis and Characterization of  $\text{Bi}(\text{VO}_4)_{1-m}(\text{PO}_4)_m$  Nanofibers  
by Electrospinning Process with Enhanced Photocatalytic  
Activity under Visible Light

*Guoshuai Liu, Suwen Liu,\* Qifang Lu, Haiyan Sun, Zhiliang Xiu*

Shandong Provincial Key Laboratory of Processing and Testing Technology of Glass  
& Functional Ceramics, School of Material Science and Engineering  
Qilu University of Technology, Jinan, 250353, P. R. China

\* Corresponding author: Tel: +86-531-89631231; Fax: +86-531-89631227

E-mail: liusw@qlu.edu.cn (Suwen Liu)

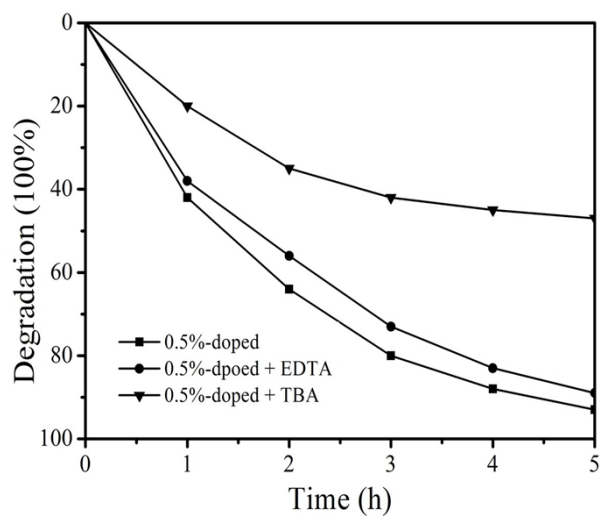

Fig. S1 The degradation of 0.5% P-doped sample for MB with various additives.

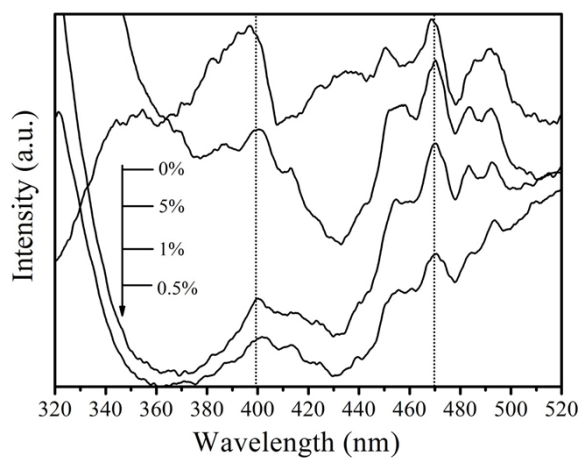

Fig. S2 Photoluminescence spectra of mBiVO<sub>4</sub> and various doped samples.

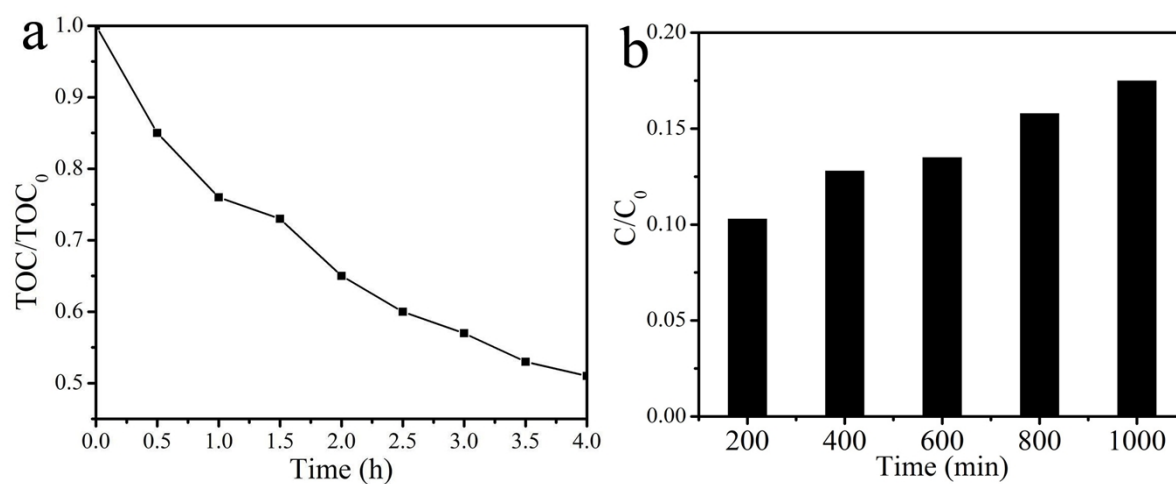

Fig. S3 Variation of TOC removal versus time for the MB dye solution with 0.5 % P doped BiVO<sub>4</sub> (a), cycling degradation curve of MB mediated by 0.5 % P doped BiVO<sub>4</sub> (b).
